# Supplementary material for: Comparison of lipid structure and composition in human or cow's milk with different fat globules by homogenization
Source: Royal Society of Chemistry journal article supplement (doi:10.1039/d2fo02515a), 2023-01-01
Supplement: d2fo02515a1.pdf [file d2fo02515a1.pdf]

*Appendix*

Comparison of lipid structure and composition in human or cow milk with  
different fat globules by homogenization

Pu Zhao <sup>1,2</sup>, Dan Li <sup>1,2</sup>, Xinghe Zhang <sup>1,2</sup>, Xingwang Ye <sup>3,4</sup>, Zhiqiang Zhang <sup>3,4</sup>, Zhengdong Liu  
<sup>3,4</sup>, Zhiyuan Yan <sup>3,4</sup>, Wei Wei <sup>1,2,\*</sup>, Qingzhe Jin <sup>1,2</sup>, Xingguo Wang <sup>1,2,\*</sup>

<sup>1</sup> *State Key Lab of Food Science and Technology, Jiangnan University, Wuxi 214122, China.*

<sup>2</sup> *Collaborative Innovation Center of Food Safety and Quality Control in Jiangsu Province, School of Food  
Science and Technology, Jiangnan University, Wuxi 214122, China.*

<sup>3</sup> *Inner Mongolia Mengniu Dairy (Group) Co. Ltd., Huhhot 011500, China.*

<sup>4</sup> *Yashili International Group Ltd., Guangzhou 510335, China.*

\*Corresponding authors:

Xingguo Wang

Tel./Fax: +86 510 85876799

Email address: [xingguow@jiangnan.edu.cn](mailto:xingguow@jiangnan.edu.cn); [wangxg1002@gmail.com](mailto:wangxg1002@gmail.com)

Wei Wei

Tel./Fax: +86 510 85329050

Email address: [weiw@jiangnan.edu.cn](mailto:weiw@jiangnan.edu.cn)

**Table S1.** TAG compositions (%) in human milk with different fat globules by homogenization.

| TAG            | Abbreviations | LHM         | MHM         | SHM         |
|----------------|---------------|-------------|-------------|-------------|
| 12:0/16:0/10:0 | La-P-Ca       | 0.05 ± 0.01 | 0.03 ± 0.01 | 0.02 ± 0.01 |
| 14:0/14:0/10:0 | M-M-Ca        | 0.02 ± 0.00 | 0.01 ± 0.00 | ND          |
| 14:0/12:0/12:0 | M-La-La       | 0.05 ± 0.01 | 0.03 ± 0.01 | 0.02 ± 0.01 |
| 18:1/16:0/6:0  | O-P-Co        | 0.24 ± 0.04 | 0.07 ± 0.01 | 0.06 ± 0.00 |
| 18:2/16:0/8:0  | L-P-Cy        | 0.08 ± 0.10 | 0.01 ± 0.00 | 0.01 ± 0.00 |
| 18:2/14:0/10:0 | L-M-Ca        | 0.11 ± 0.02 | 0.05 ± 0.00 | 0.06 ± 0.01 |
| 18:2/12:0/12:0 | L-La-La       | 0.17 ± 0.08 | 0.10 ± 0.00 | 0.10 ± 0.01 |
| 18:0/14:0/8:0  | S-M-Cy        | 0.01 ± 0.00 | ND          | ND          |
| 18:0/10:0/12:0 | S-Ca-La       | 0.03 ± 0.00 | 0.02 ± 0.00 | 0.01 ± 0.00 |
| 16:0/12:0/12:0 | P-La-La       | 0.08 ± 0.00 | 0.05 ± 0.01 | 0.05 ± 0.00 |
| 14:0/16:0/10:0 | M-P-Ca        | 0.07 ± 0.00 | 0.04 ± 0.01 | 0.04 ± 0.00 |
| 14:0/14:0/12:0 | M-M-La        | 0.02 ± 0.00 | 0.02 ± 0.00 | 0.01 ± 0.00 |
| 18:1/12:0/12:0 | O-La-La       | 0.36 ± 0.02 | 0.18 ± 0.03 | 0.16 ± 0.00 |
| 18:1/14:0/10:0 | O-M-Ca        | 0.16 ± 0.06 | 0.06 ± 0.01 | 0.05 ± 0.00 |
| 16:1/14:0/12:0 | Po-M-La       | 0.04 ± 0.00 | 0.02 ± 0.00 | 0.02 ± 0.00 |
| 18:2/16:0/10:0 | L-P-Ca        | 0.38 ± 0.17 | 0.27 ± 0.03 | 0.13 ± 0.00 |
| 18:2/14:0/12:0 | L-M-La        | 0.41 ± 0.17 | 0.23 ± 0.02 | 0.27 ± 0.01 |
| 18:2/12:0/18:2 | L-La-L        | 0.81 ± 0.03 | 0.55 ± 0.05 | 0.47 ± 0.01 |
| 18:2/18:2/18:3 | L-L-Ln        | 0.44 ± 0.04 | 0.34 ± 0.05 | 0.30 ± 0.05 |
| 18:0/12:0/12:0 | S-La-La       | 0.07 ± 0.01 | 0.04 ± 0.00 | 0.04 ± 0.00 |
| 18:0/14:0/10:0 | S-M-Ca        | 0.03 ± 0.01 | 0.01 ± 0.00 | 0.01 ± 0.00 |
| 14:0/16:0/12:0 | M-P-La        | 0.10 ± 0.01 | 0.06 ± 0.00 | 0.06 ± 0.00 |
| 16:0/16:0/10:0 | P-P-Ca        | 0.10 ± 0.02 | 0.08 ± 0.00 | 0.07 ± 0.00 |
| 14:0/14:0/14:0 | M-M-M         | 0.02 ± 0.01 | 0.01 ± 0.00 | 0.01 ± 0.00 |
| 18:1/16:0/10:0 | O-P-Ca        | 0.49 ± 0.06 | 0.43 ± 0.04 | 0.43 ± 0.05 |
| 18:1/14:0/12:0 | O-M-La        | 0.73 ± 0.09 | 0.38 ± 0.05 | 0.27 ± 0.08 |
| 18:2/16:0/12:0 | L-P-La        | 1.43 ± 0.09 | 1.09 ± 0.23 | 0.97 ± 0.13 |
| 18:2/14:0/14:0 | L-M-M         | 0.08 ± 0.01 | 0.15 ± 0.00 | 0.15 ± 0.06 |
| 18:1/12:0/18:2 | O-La-L        | 1.65 ± 0.10 | 1.47 ± 0.35 | 1.46 ± 0.04 |
| 18:1/16:1/14:1 | O-Po-Mo       | 0.02 ± 0.00 | 0.02 ± 0.01 | 0.02 ± 0.00 |
| 16:1/16:1/16:1 | Po-Po-Po      | 0.02 ± 0.01 | 0.01 ± 0.00 | 0.01 ± 0.01 |
| 18:2/14:0/18:2 | L-M-L         | 0.87 ± 0.05 | 0.96 ± 0.43 | 1.14 ± 0.53 |
| 18:2/18:2/18:2 | L-L-L         | 2.52 ± 0.34 | 2.33 ± 0.49 | 2.27 ± 0.05 |
| 18:2/16:0/18:3 | L-P-Ln        | 0.78 ± 0.08 | 0.98 ± 0.02 | 0.99 ± 0.10 |
| 18:0/10:0/16:0 | S-Ca-P        | 0.11 ± 0.02 | 0.13 ± 0.01 | 0.12 ± 0.01 |
| 18:0/14:0/12:0 | S-M-La        | 0.10 ± 0.06 | 0.06 ± 0.01 | 0.05 ± 0.00 |
| 16:0/16:0/12:0 | P-P-La        | 0.11 ± 0.01 | 0.11 ± 0.01 | 0.11 ± 0.01 |

|                |         |              |              |              |
|----------------|---------|--------------|--------------|--------------|
| 16:0/14:0/14:0 | P-M-M   | 0.09 ± 0.04  | 0.05 ± 0.01  | 0.05 ± 0.00  |
| 18:1/16:0/12:0 | O-P-La  | 1.65 ± 0.06  | 1.09 ± 0.00  | 1.01 ± 0.04  |
| 18:1/14:0/14:0 | O-M-M   | 0.13 ± 0.05  | 0.14 ± 0.05  | 0.14 ± 0.02  |
| 18:1/12:0/18:1 | O-La-O  | 1.30 ± 0.04  | 0.91 ± 0.07  | 0.91 ± 0.08  |
| 18:1/14:0/16:1 | O-M-Po  | 0.16 ± 0.00  | 0.11 ± 0.04  | 0.10 ± 0.04  |
| 18:0/12:0/18:2 | S-La-L  | 0.51 ± 0.07  | 0.53 ± 0.15  | 0.59 ± 0.23  |
| 18:2/16:0/14:0 | L-P-M   | 0.58 ± 0.14  | 0.76 ± 0.16  | 0.68 ± 0.04  |
| 18:1/14:0/18:2 | O-M-L   | 1.49 ± 0.01  | 1.32 ± 0.03  | 1.68 ± 0.14  |
| 18:1/16:1/16:1 | O-Po-Po | 0.13 ± 0.02  | 0.08 ± 0.05  | 0.08 ± 0.07  |
| 18:2/16:0/16:1 | L-P-Po  | 0.30 ± 0.15  | 0.31 ± 0.03  | 0.48 ± 0.03  |
| 18:1/16:0/18:3 | O-P-Ln  | 3.75 ± 0.58  | 1.82 ± 0.16  | 2.95 ± 2.03  |
| 18:2/16:0/18:2 | L-P-L   | 3.07 ± 0.03  | 4.75 ± 0.99  | 4.08 ± 2.11  |
| 18:1/18:2/18:2 | O-L-L   | 6.13 ± 0.06  | 6.35 ± 0.07  | 6.21 ± 0.39  |
| 18:0/18:2/18:3 | S-L-Ln  | 0.77 ± 0.15  | 0.46 ± 0.20  | 0.85 ± 0.05  |
| 18:1/18:1/18:3 | O-O-Ln  | 1.31 ± 0.28  | 0.97 ± 0.12  | 0.85 ± 0.11  |
| 18:0/16:0/12:0 | S-P-La  | 0.23 ± 0.01  | 0.21 ± 0.00  | 0.27 ± 0.05  |
| 18:0/14:0/14:0 | S-M-M   | 0.07 ± 0.02  | 0.01 ± 0.00  | 0.07 ± 0.01  |
| 16:0/16:0/14:0 | P-P-M   | 0.05 ± 0.00  | 0.17 ± 0.00  | 0.05 ± 0.01  |
| 18:0/12:0/18:1 | S-La-O  | 0.48 ± 0.09  | 0.19 ± 0.04  | 0.31 ± 0.06  |
| 18:1/16:0/14:0 | O-P-M   | 0.83 ± 0.02  | 0.96 ± 0.11  | 0.99 ± 0.13  |
| 18:1/14:0/18:1 | O-M-O   | 1.39 ± 0.03  | 1.25 ± 0.03  | 1.17 ± 0.02  |
| 18:1/16:0/16:1 | O-P-Po  | 0.75 ± 0.14  | 0.60 ± 0.14  | 0.67 ± 0.01  |
| 18:0/14:0/18:2 | S-M-L   | 0.25 ± 0.03  | 0.52 ± 0.12  | 0.42 ± 0.03  |
| 16:0/16:0/18:2 | P-P-L   | 1.94 ± 0.11  | 2.11 ± 0.25  | 2.37 ± 0.10  |
| 18:1/16:0/18:2 | O-P-L   | 15.15 ± 0.82 | 14.81 ± 0.60 | 14.76 ± 1.03 |
| 18:1/18:1/18:2 | O-O-L   | 7.51 ± 0.01  | 7.50 ± 0.01  | 7.37 ± 0.27  |
| 18:1/16:1/18:1 | O-Po-O  | 2.78 ± 0.13  | 3.04 ± 0.66  | 3.06 ± 0.62  |
| 18:0/18:2/18:2 | S-L-L   | 2.95 ± 0.38  | 3.42 ± 0.11  | 3.22 ± 0.46  |
| 18:2/16:0/17:0 | L-P-Ha  | 0.21 ± 0.01  | 0.21 ± 0.06  | 0.19 ± 0.16  |
| 18:0/16:0/14:0 | S-M-P   | 0.12 ± 0.01  | 0.15 ± 0.01  | 0.18 ± 0.05  |
| 16:0/16:0/16:0 | P-P-P   | 0.14 ± 0.01  | 0.18 ± 0.01  | 0.22 ± 0.06  |
| 18:0/14:0/18:1 | S-M-O   | 0.44 ± 0.04  | 0.44 ± 0.09  | 0.51 ± 0.02  |
| 18:1/16:0/16:0 | O-P-P   | 2.67 ± 0.11  | 2.80 ± 0.08  | 2.36 ± 0.54  |
| 18:1/16:0/18:1 | O-P-O   | 11.74 ± 0.27 | 12.12 ± 0.35 | 11.79 ± 0.03 |
| 20:2/16:0/18:1 | Ed-P-O  | 0.23 ± 0.04  | 0.44 ± 0.14  | 0.36 ± 0.11  |
| 18:1/18:1/18:1 | O-O-O   | 3.52 ± 0.17  | 3.24 ± 0.28  | 3.43 ± 0.36  |
| 18:0/16:0/18:2 | S-P-L   | 3.37 ± 0.19  | 4.48 ± 0.00  | 4.09 ± 0.01  |
| 18:0/18:2/18:1 | S-L-O   | 2.80 ± 0.02  | 3.76 ± 0.04  | 3.71 ± 0.49  |
| 18:0/15:0/18:1 | S-Pa-O  | 0.03 ± 0.00  | 0.04 ± 0.01  | 0.03 ± 0.00  |
| 18:1/16:0/17:0 | O-P-Ha  | 0.14 ± 0.00  | 0.17 ± 0.05  | 0.11 ± 0.02  |

|                |        |             |             |             |
|----------------|--------|-------------|-------------|-------------|
| 16:0/16:0/18:0 | P-P-S  | 0.31 ± 0.04 | 0.38 ± 0.04 | 0.46 ± 0.05 |
| 18:0/16:0/18:1 | S-P-O  | 2.84 ± 0.02 | 3.22 ± 0.32 | 3.29 ± 0.21 |
| 18:1/18:0/18:1 | O-S-O  | 1.29 ± 0.07 | 1.51 ± 0.08 | 1.42 ± 0.02 |
| 20:1/16:0/18:1 | Eo-P-O | 0.12 ± 0.03 | 0.23 ± 0.02 | 0.13 ± 0.03 |
| 18:0/18:0/18:2 | S-S-L  | 0.31 ± 0.07 | 0.39 ± 0.04 | 0.54 ± 0.17 |
| 20:0/16:0/18:2 | E-P-L  | 0.05 ± 0.02 | 0.05 ± 0.01 | 0.13 ± 0.01 |
| 18:1/20:0/18:2 | O-E-L  | 0.38 ± 0.02 | 0.46 ± 0.01 | 0.61 ± 0.07 |
| 18:0/18:0/16:0 | S-S-P  | 0.18 ± 0.00 | 0.27 ± 0.03 | 0.27 ± 0.04 |
| 20:0/16:0/18:1 | E-P-O  | 0.13 ± 0.00 | 0.16 ± 0.00 | 0.19 ± 0.02 |
| 18:0/18:0/18:1 | S-S-O  | 0.11 ± 0.00 | 0.13 ± 0.00 | 0.16 ± 0.02 |
| 22:0/18:2/16:0 | Do-L-P | 0.21 ± 0.03 | 0.23 ± 0.01 | 0.24 ± 0.04 |
| 20:0/18:1/18:1 | E-O-O  | 0.05 ± 0.01 | 0.06 ± 0.00 | 0.06 ± 0.01 |
| 22:0/16:0/16:0 | Do-P-P | 0.01 ± 0.00 | ND          | 0.01 ± 0.00 |
| 20:0/16:0/18:0 | E-P-S  | 0.04 ± 0.01 | ND          | 0.06 ± 0.01 |
| 18:0/18:0/18:0 | S-S-S  | 0.01 ± 0.00 | ND          | 0.02 ± 0.01 |
| 22:0/16:0/18:1 | Do-P-O | 0.05 ± 0.01 | ND          | 0.04 ± 0.00 |
| 18:0/20:0/18:1 | S-E-O  | 0.02 ± 0.00 | ND          | 0.02 ± 0.00 |

---

The values are represented as the means ± SD.

**Table S2.** TAG compositions (%) in cow milk with different fat globules by homogenization.

| TAG            | Abbreviations | LCM         | MCM         | SCM         |
|----------------|---------------|-------------|-------------|-------------|
| 4:0/6:0/16:0   | Co-B-P        | 0.12 ± 0.01 | 0.09 ± 0.00 | 0.14 ± 0.01 |
| 4:0/8:0/14:0   | B-Cy-M        | 0.08 ± 0.01 | 0.08 ± 0.00 | 0.03 ± 0.00 |
| 4:0/18:1/6:0   | B-O-Co        | 0.10 ± 0.00 | 0.09 ± 0.00 | 0.10 ± 0.00 |
| 4:0/14:0/10:0  | B-M-C         | 0.15 ± 0.01 | 0.13 ± 0.00 | 0.11 ± 0.00 |
| 4:0/18:0/6:0   | B-S-Co        | 0.05 ± 0.00 | 0.01 ± 0.00 | ND          |
| 6:0/14:0/8:0   | Co-M-Cy       | 0.09 ± 0.01 | 0.13 ± 0.00 | 0.12 ± 0.00 |
| 8:0/4:0/16:0   | Cy-B-P        | 0.28 ± 0.02 | 0.18 ± 0.00 | 0.18 ± 0.00 |
| 8:0/4:0/18:1   | Cy-B-O        | 0.25 ± 0.02 | 0.21 ± 0.01 | 0.21 ± 0.01 |
| 10:0/6:0/14:0  | Ca-Co-M       | 0.29 ± 0.02 | 0.29 ± 0.00 | 0.35 ± 0.01 |
| 4:0/10:0/16:0  | B-Ca-P        | 0.58 ± 0.04 | 0.35 ± 0.01 | 0.34 ± 0.01 |
| 10:0/8:0/12:0  | Ca-Cy-La      | 0.22 ± 0.02 | 0.26 ± 0.00 | 0.20 ± 0.01 |
| 12:0/6:0/14:1  | La-Co-Mo      | 0.08 ± 0.01 | 0.08 ± 0.00 | 0.08 ± 0.00 |
| 6:0/10:0/16:1  | Co-Ca-Po      | 0.05 ± 0.01 | 0.05 ± 0.00 | 0.02 ± 0.00 |
| 4:0/10:0/18:1  | B-Ca-O        | 0.39 ± 0.04 | 0.33 ± 0.02 | 0.36 ± 0.01 |
| 12:0/6:0/14:0  | La-Co-Mo      | 0.69 ± 0.03 | 0.67 ± 0.03 | 0.77 ± 0.04 |
| 4:0/10:0/18:0  | B-Ca-S        | 0.59 ± 0.03 | 0.51 ± 0.02 | 0.46 ± 0.02 |
| 12:0/4:0/16:0  | La-B-P        | 0.91 ± 0.04 | 0.85 ± 0.04 | 0.68 ± 0.04 |
| 12:0/10:0/10:0 | La-Ca-Ca      | 0.21 ± 0.01 | 0.23 ± 0.01 | 0.23 ± 0.01 |
| 4:0/14:0/15:0  | B-M-Pa        | 0.26 ± 0.00 | 0.33 ± 0.08 | 0.35 ± 0.03 |
| 4:0/12:0/18:2  | B-La-L        | 0.13 ± 0.02 | 0.12 ± 0.00 | 0.12 ± 0.00 |
| 4:0/12:0/18:1  | B-La-O        | 1.12 ± 0.03 | 1.06 ± 0.02 | 1.02 ± 0.04 |
| 6:0/12:0/16:0  | Co-La-P       | 0.97 ± 0.08 | 0.99 ± 0.03 | 0.92 ± 0.03 |
| 14:0/4:0/16:0  | M-B-P         | 5.01 ± 0.20 | 4.80 ± 0.40 | 4.51 ± 0.06 |
| 4:0/12:0/18:0  | B-La-S        | 0.45 ± 0.02 | 0.34 ± 0.03 | 0.36 ± 0.00 |
| 14:0/6:0/15:0  | M-Co-Pa       | 0.34 ± 0.01 | 0.47 ± 0.01 | 0.05 ± 0.00 |
| 4:0/15:0/16:0  | B-Pa-P        | 0.64 ± 0.01 | 0.48 ± 0.01 | 0.51 ± 0.04 |
| 6:0/16:0/14:0  | Co-P-M        | 2.34 ± 0.00 | 2.35 ± 0.24 | 2.23 ± 0.03 |
| 16:0/4:0/16:0  | P-B-P         | 9.27 ± 0.58 | 8.75 ± 1.17 | 9.02 ± 0.84 |
| 14:0/4:0/18:2  | M-B-L         | 0.36 ± 0.01 | 0.38 ± 0.00 | 0.38 ± 0.01 |
| 14:1/4:0/18:1  | Mo-B-O        | 0.07 ± 0.00 | 0.05 ± 0.00 | 0.07 ± 0.00 |
| 16:1/4:0/16:0  | Po-B-P        | 1.21 ± 0.01 | 1.11 ± 0.02 | 1.06 ± 0.04 |
| 14:0/4:0/18:1  | M-B-O         | 2.14 ± 0.01 | 2.17 ± 0.03 | 2.11 ± 0.08 |
| 4:0/15:0/18:1  | B-Pa-O        | 0.34 ± 0.00 | 0.35 ± 0.00 | 0.30 ± 0.00 |
| 4:0/18:0/15:0  | B-S-Pa        | 0.09 ± 0.01 | 0.23 ± 0.00 | 0.21 ± 0.02 |
| 16:0/4:0/17:0  | P-B-Ha        | 0.19 ± 0.01 | 0.31 ± 0.00 | 0.39 ± 0.04 |
| 6:0/15:0/16:0  | Co-Pa-P       | 0.26 ± 0.02 | 0.27 ± 0.00 | 0.18 ± 0.02 |
| 16:0/6:0/16:0  | P-Co-P        | 0.29 ± 0.02 | 0.57 ± 0.02 | 0.27 ± 0.02 |

|                |         |             |             |             |
|----------------|---------|-------------|-------------|-------------|
| 14:0/10:0/14:0 | M-C-M   | 0.55 ± 0.03 | 0.30 ± 0.01 | 1.55 ± 0.10 |
| 8:0/14:0/16:0  | Cy-M-P  | 3.14 ± 0.19 | 3.56 ± 0.13 | 1.26 ± 0.08 |
| 16:0/10:0/12:0 | P-C-La  | 1.08 ± 0.07 | 0.55 ± 0.02 | 1.93 ± 0.12 |
| 4:0/18:0/16:0  | B-S-P   | 2.94 ± 0.02 | 2.94 ± 0.04 | 2.94 ± 0.10 |
| 6:0/14:0/18:1  | Co-M-O  | 1.08 ± 0.14 | 1.16 ± 0.06 | 1.10 ± 0.20 |
| 16:0/4:0/18:1  | P-B-O   | 7.49 ± 0.02 | 7.03 ± 0.09 | 6.74 ± 0.31 |
| 16:0/4:0/18:2  | P-B-L   | 1.09 ± 0.17 | 1.06 ± 0.02 | 1.08 ± 0.07 |
| 4:0/16:1/18:1  | B-Po-O  | 0.20 ± 0.03 | 0.27 ± 0.01 | 0.25 ± 0.02 |
| 6:0/16:0/17:0  | P-Co-Ha | 0.12 ± 0.00 | 0.25 ± 0.01 | 0.23 ± 0.04 |
| 17:0/4:0/18:0  | Ha-B-S  | 0.11 ± 0.00 | 0.15 ± 0.01 | 0.05 ± 0.01 |
| 15:0/8:0/16:0  | Pa-Cy-P | 0.20 ± 0.00 | 0.05 ± 0.00 | 0.13 ± 0.02 |
| 17:0/4:0/18:1  | Ha-B-O  | 0.19 ± 0.01 | 0.20 ± 0.00 | 0.19 ± 0.01 |
| 15:0/6:0/18:1  | Pa-P-O  | 0.19 ± 0.01 | 0.19 ± 0.00 | 0.17 ± 0.00 |
| 14:0/10:0/16:0 | M-C-P   | 2.25 ± 0.04 | 2.08 ± 0.06 | 2.30 ± 0.22 |
| 10:0/18:0/12:0 | C-S-La  | 0.39 ± 0.01 | 0.49 ± 0.01 | 0.41 ± 0.04 |
| 16:0/6:0/18:0  | P-Co-S  | 1.25 ± 0.13 | 1.37 ± 0.09 | 1.17 ± 0.05 |
| 16:0/6:0/18:1  | P-Co-O  | 3.42 ± 0.23 | 3.26 ± 0.14 | 3.22 ± 0.04 |
| 18:1/4:0/18:0  | O-B-S   | 1.18 ± 0.06 | 1.33 ± 0.06 | 1.28 ± 0.02 |
| 18:1/4:0/18:1  | O-B-O   | 1.69 ± 0.14 | 1.91 ± 0.01 | 1.82 ± 0.08 |
| 6:0/16:1/18:1  | Co-Po-O | 0.25 ± 0.02 | 0.07 ± 0.00 | 0.14 ± 0.01 |
| 18:2/4:0/18:1  | L-B-O   | 0.46 ± 0.04 | 0.46 ± 0.02 | 0.45 ± 0.00 |
| 15:0/10:0/16:0 | Pa-C-P  | 0.18 ± 0.01 | 0.17 ± 0.01 | 0.20 ± 0.04 |
| 14:0/17:0/10:0 | M-Ha-C  | 0.07 ± 0.00 | 0.09 ± 0.01 | 0.07 ± 0.01 |
| 16:0/10:0/16:0 | P-C-P   | 1.92 ± 0.10 | 1.92 ± 0.13 | 1.96 ± 0.16 |
| 12:0/16:0/14:0 | La-P-M  | 0.81 ± 0.04 | 0.92 ± 0.06 | 1.13 ± 0.09 |
| 10:0/14:0/18:0 | C-M-S   | 0.44 ± 0.02 | 0.32 ± 0.02 | 0.22 ± 0.02 |
| 16:0/8:0/18:1  | P-Cy-O  | 1.17 ± 0.08 | 1.24 ± 0.06 | 1.24 ± 0.04 |
| 14:0/10:0/18:1 | M-C-O   | 0.57 ± 0.04 | 0.35 ± 0.02 | 0.49 ± 0.02 |
| 18:1/6:0/18:0  | O-Co-S  | 0.74 ± 0.01 | 0.83 ± 0.08 | 0.69 ± 0.13 |
| 15:0/12:0/16:0 | Pa-La-P | 0.14 ± 0.02 | 0.15 ± 0.03 | 0.15 ± 0.03 |
| 10:0/18:0/15:0 | C-P-Pa  | 0.05 ± 0.01 | 0.04 ± 0.01 | 0.05 ± 0.01 |
| 16:0/18:0/10:0 | P-S-C   | 1.23 ± 0.04 | 1.14 ± 0.05 | 1.31 ± 0.03 |
| 12:0/18:0/14:0 | La-S-M  | 0.93 ± 0.03 | 0.94 ± 0.04 | 1.00 ± 0.03 |
| 14:0/16:0/14:0 | M-P-M   | 0.30 ± 0.01 | 0.36 ± 0.02 | 0.29 ± 0.01 |
| 16:0/10:0/18:1 | P-C-O   | 1.82 ± 0.05 | 1.83 ± 0.06 | 1.93 ± 0.02 |
| 14:0/12:0/18:1 | M-La-O  | 0.59 ± 0.02 | 0.67 ± 0.02 | 0.60 ± 0.01 |
| 18:1/8:0/18:1  | O-Cy-O  | 0.30 ± 0.00 | 0.33 ± 0.01 | 0.32 ± 0.00 |
| 16:0/10:0/18:2 | P-C-L   | 0.40 ± 0.00 | 0.38 ± 0.01 | 0.40 ± 0.00 |
| 16:0/14:0/16:0 | P-M-P   | 1.47 ± 0.08 | 1.50 ± 0.08 | 1.62 ± 0.00 |
| 14:0/18:0/14:0 | M-S-M   | 0.25 ± 0.01 | 0.15 ± 0.01 | 0.32 ± 0.00 |

|                |        |             |             |             |
|----------------|--------|-------------|-------------|-------------|
| 16:0/12:0/18:0 | P-La-S | 0.48 ± 0.03 | 0.53 ± 0.03 | 0.54 ± 0.00 |
| 16:0/12:0/18:1 | P-La-O | 2.08 ± 0.00 | 2.19 ± 0.02 | 2.31 ± 0.03 |
| 18:0/10:0/18:1 | S-C-O  | 0.36 ± 0.00 | 0.36 ± 0.00 | 0.33 ± 0.00 |
| 16:0/14:0/18:0 | P-M-S  | 1.28 ± 0.18 | 1.28 ± 0.01 | 1.25 ± 0.02 |
| 16:0/16:0/16:0 | P-P-P  | 0.89 ± 0.12 | 0.78 ± 0.01 | 0.95 ± 0.02 |
| 16:0/14:0/18:1 | P-M-O  | 3.78 ± 0.31 | 4.19 ± 0.43 | 4.37 ± 0.41 |
| 16:0/14:1/18:1 | P-Mo-O | 0.38 ± 0.05 | 0.38 ± 0.00 | 0.37 ± 0.02 |
| 18:1/12:0/18:1 | O-La-O | 0.18 ± 0.02 | 0.15 ± 0.00 | 0.22 ± 0.01 |
| 16:0/14:0/18:2 | P-M-L  | 0.49 ± 0.08 | 0.56 ± 0.01 | 0.52 ± 0.06 |
| 16:0/15:0/18:1 | P-Pa-O | 0.28 ± 0.01 | 0.31 ± 0.00 | 0.33 ± 0.00 |
| 16:0/18:0/16:0 | P-S-P  | 1.21 ± 0.12 | 1.02 ± 0.05 | 1.19 ± 0.01 |
| 16:0/18:1/16:0 | P-O-P  | 6.19 ± 1.06 | 6.67 ± 1.11 | 6.84 ± 0.88 |
| 16:0/16:1/18:1 | P-Po-O | 0.69 ± 0.07 | 0.75 ± 0.06 | 0.81 ± 0.12 |
| 18:1/14:0/18:1 | O-M-O  | 0.37 ± 0.04 | 0.46 ± 0.04 | 0.39 ± 0.06 |
| 16:0/18:2/16:0 | P-L-P  | 0.74 ± 0.03 | 0.78 ± 0.07 | 0.81 ± 0.01 |
| 18:0/16:0/18:0 | S-P-S  | 0.28 ± 0.01 | 0.24 ± 0.05 | 0.29 ± 0.04 |
| 18:1/16:0/18:0 | O-P-S  | 2.00 ± 0.32 | 2.13 ± 0.23 | 2.14 ± 0.15 |
| 18:1/16:0/18:1 | O-P-O  | 3.23 ± 0.58 | 3.69 ± 0.75 | 3.53 ± 0.49 |
| 16:0/18:1/18:2 | P-O-L  | 0.76 ± 0.06 | 0.82 ± 0.12 | 0.84 ± 0.00 |
| 18:1/18:0/18:1 | O-S-O  | 0.51 ± 0.03 | 0.53 ± 0.05 | 0.57 ± 0.03 |
| 18:1/18:0/18:2 | O-S-L  | 0.55 ± 0.07 | 0.58 ± 0.05 | 0.56 ± 0.07 |

---

The values are represented as the means ± SD.

**Table S3.** Phospholipid compositions (%) in human and cow milk with different fat globules by homogenization.

| Class | m/z         | Adducts            | Molecular species | Relative content (%) |              |              |              |              |              |
|-------|-------------|--------------------|-------------------|----------------------|--------------|--------------|--------------|--------------|--------------|
|       |             |                    |                   | LHM                  | MHM          | SHM          | LCM          | MCM          | SCM          |
| LPC   | 482.3547117 | [M+H] <sup>+</sup> | PC(O-16:0/0:0)    | 0.18 ± 0.02          | 0.22 ± 0.06  | 0.28 ± 0.02  | 0.39 ± 0.00  | 1.47 ± 0.08  | 1.28 ± 0.01  |
|       | 468.3114852 | [M+H] <sup>+</sup> | PC(14:0/0:0)      | 0.29 ± 0.04          | 0.45 ± 0.05  | 0.44 ± 0.01  | 3.46 ± 0.02  | 4.82 ± 0.04  | 4.77 ± 0.00  |
|       | 520.3360712 | [M+H] <sup>+</sup> | PC(18:2/0:0)      | 33.15 ± 2.23         | 32.29 ± 0.57 | 35.06 ± 0.62 | 8.89 ± 0.05  | 19.58 ± 0.38 | 13.41 ± 0.95 |
|       | 544.3396071 | [M+H] <sup>+</sup> | PC(20:4/0:0)      | 2.60 ± 0.23          | 2.57 ± 0.30  | 2.74 ± 0.04  | 1.50 ± 0.00  | 4.04 ± 0.14  | 2.57 ± 0.03  |
|       | 518.3200121 | [M+H] <sup>+</sup> | PC(18:3/0:0)      | 1.85 ± 0.20          | 2.48 ± 0.32  | 2.09 ± 0.05  | 1.93 ± 0.12  | 3.39 ± 0.12  | 3.21 ± 0.08  |
|       | 522.3522322 | [M+H] <sup>+</sup> | PC(18:1/0:0)      | 13.01 ± 0.16         | 11.53 ± 0.01 | 10.56 ± 0.38 | 21.29 ± 0.40 | 31.19 ± 0.04 | 25.25 ± 0.36 |
|       | 510.3678584 | [M+H] <sup>+</sup> | PC(17:0/0:0)      | 0.21 ± 0.02          | 0.27 ± 0.01  | 0.31 ± 0.03  | 0.01 ± 0.01  | 0.92 ± 0.07  | 0.71 ± 0.02  |
|       | 496.3199088 | [M+H] <sup>+</sup> | PC(16:0/0:0)      | 18.55 ± 0.99         | 21.09 ± 0.51 | 22.02 ± 0.90 | 31.41 ± 0.34 | 24.16 ± 1.06 | 29.85 ± 0.26 |
|       | 524.3469632 | [M+H] <sup>+</sup> | PC(18:0/0:0)      | 30.17 ± 3.88         | 29.09 ± 0.81 | 26.46 ± 0.72 | 31.13 ± 0.79 | 10.44 ± 1.18 | 18.93 ± 0.43 |
|       | 480.3422715 | [M+H] <sup>+</sup> | PC(O-16:1/0:0)    | 0.01 ± 0.00          | 0.02 ± 0.00  | 0.03 ± 0.03  | ND           | ND           | ND           |
| PS    | 840.5783589 | [M-H] <sup>-</sup> | PS(22:0/18:3)     | 8.05 ± 0.29          | 10.30 ± 0.70 | 9.64 ± 0.10  | 11.50 ± 0.41 | 10.39 ± 0.32 | 12.13 ± 0.12 |
|       | 790.5634472 | [M-H] <sup>-</sup> | PS(20:0/16:0)     | 1.87 ± 0.06          | 1.31 ± 0.02  | 1.51 ± 0.07  | 28.09 ± 1.71 | 29.17 ± 0.10 | 27.95 ± 0.56 |
|       | 802.5657307 | [M-H] <sup>-</sup> | PS(19:0/18:1)     | 5.66 ± 0.12          | 4.76 ± 0.11  | 4.42 ± 0.13  | 7.23 ± 0.86  | 8.21 ± 0.54  | 7.34 ± 0.47  |
|       | 858.5908368 | [M-H] <sup>-</sup> | PS(20:1/21:0)     | 4.31 ± 0.19          | 5.80 ± 0.41  | 5.32 ± 0.43  | 6.74 ± 0.30  | 5.35 ± 0.17  | 6.24 ± 0.21  |
|       | 804.5792778 | [M-H] <sup>-</sup> | PS(19:0/18:0)     | 5.47 ± 0.41          | 4.57 ± 0.07  | 4.60 ± 0.20  | 14.67 ± 0.28 | 16.36 ± 0.35 | 15.23 ± 0.18 |
|       | 830.5915356 | [M-H] <sup>-</sup> | PS(21:0/18:1)     | 13.54 ± 0.38         | 12.07 ± 0.10 | 11.94 ± 0.52 | 5.80 ± 0.12  | 6.38 ± 0.45  | 6.24 ± 0.38  |
|       | 868.6054034 | [M-H] <sup>-</sup> | PS(22:0/20:3)     | 11.21 ± 0.01         | 10.90 ± 0.53 | 11.38 ± 0.10 | 4.82 ± 0.09  | 3.59 ± 0.28  | 4.16 ± 0.07  |
|       | 860.6062115 | [M-H] <sup>-</sup> | PS(21:0/20:0)     | 49.90 ± 0.14         | 50.29 ± 1.11 | 51.18 ± 0.05 | 21.14 ± 0.21 | 20.55 ± 0.76 | 20.70 ± 0.21 |
| PA    | 761.5833392 | [M-H] <sup>-</sup> | PA(O-20:0/22:6)   | ND                   | ND           | ND           | 3.73 ± 0.07  | 2.80 ± 0.50  | 4.54 ± 0.69  |
|       | 697.4843875 | [M-H] <sup>-</sup> | PA(18:2/18:1)     | 12.01 ± 0.59         | 12.44 ± 1.75 | 12.81 ± 0.20 | 14.69 ± 3.23 | 10.54 ± 0.53 | 12.48 ± 0.81 |
|       | 673.4844665 | [M-H] <sup>-</sup> | PA(18:1/16:0)     | 10.18 ± 0.27         | 12.43 ± 0.03 | 9.83 ± 0.47  | 28.55 ± 2.38 | 36.62 ± 0.24 | 33.78 ± 0.41 |
|       | 725.5151726 | [M-H] <sup>-</sup> | PA(18:0/20:3)     | 34.63 ± 0.50         | 34.15 ± 0.37 | 34.62 ± 0.25 | 13.52 ± 1.30 | 7.51 ± 0.16  | 9.64 ± 0.05  |
|       | 699.5000022 | [M-H] <sup>-</sup> | PA(18:2/18:0)     | 43.18 ± 0.81         | 40.98 ± 2.09 | 42.74 ± 0.43 | 39.27 ± 2.07 | 42.08 ± 0.35 | 39.24 ± 1.11 |



|     |             |                    |                 |              |              |              |              |              |              |
|-----|-------------|--------------------|-----------------|--------------|--------------|--------------|--------------|--------------|--------------|
|     | 635.4404275 | [M-H] <sup>-</sup> | PA(P-16:0/12:0) | ND           | ND           | ND           | 0.24 ± 0.02  | 0.45 ± 0.02  | 0.32 ± 0.09  |
| LPE | 524.2825112 | [M-H] <sup>-</sup> | PE(22:6/0:0)    | 4.13 ± 0.22  | 5.16 ± 0.47  | 5.88 ± 0.15  | ND           | 0.03 ± 0.01  | ND           |
|     | 498.2629773 | [M-H] <sup>-</sup> | PE(20:5/0:0)    | 0.96 ± 0.35  | 1.33 ± 0.16  | 1.56 ± 0.01  | 0.10 ± 0.15  | 1.42 ± 0.00  | 1.22 ± 0.11  |
|     | 476.2757835 | [M-H] <sup>-</sup> | PE(18:2/0:0)    | 26.48 ± 0.00 | 27.43 ± 0.07 | 27.18 ± 0.24 | 22.01 ± 0.64 | 28.47 ± 0.40 | 28.65 ± 0.73 |
|     | 526.2956117 | [M-H] <sup>-</sup> | PE(22:5/0:0)    | 2.65 ± 0.22  | 2.92 ± 0.09  | 3.22 ± 0.09  | ND           | 1.12 ± 0.02  | 0.90 ± 0.07  |
|     | 500.2784537 | [M-H] <sup>-</sup> | PE(20:4/0:0)    | 13.85 ± 0.55 | 13.80 ± 0.15 | 16.15 ± 0.04 | 6.11 ± 0.37  | 10.44 ± 0.07 | 10.18 ± 0.09 |
|     | 452.2792834 | [M-H] <sup>-</sup> | PE(16:0/0:0)    | 3.92 ± 0.14  | 4.00 ± 0.01  | 3.92 ± 0.07  | 8.34 ± 0.10  | 4.53 ± 0.06  | 4.71 ± 0.13  |
|     | 528.3103585 | [M-H] <sup>-</sup> | PE(22:4/0:0)    | 2.68 ± 0.02  | 2.91 ± 0.04  | 3.43 ± 0.13  | ND           | 1.28 ± 0.12  | 0.92 ± 0.11  |
|     | 478.2909952 | [M-H] <sup>-</sup> | PE(18:1/0:0)    | 39.98 ± 0.88 | 37.16 ± 0.21 | 32.86 ± 0.35 | 63.44 ± 0.32 | 52.53 ± 0.55 | 53.35 ± 1.02 |
|     | 506.3267053 | [M-H] <sup>-</sup> | PE(20:1/0:0)    | 3.49 ± 0.05  | 3.70 ± 0.18  | 3.80 ± 0.21  | ND           | 0.18 ± 0.04  | 0.08 ± 0.00  |
|     | 436.2777662 | [M-H] <sup>-</sup> | PE(P-16:0/0:0)  | 0.89 ± 0.03  | 0.76 ± 0.02  | 0.86 ± 0.09  | ND           | ND           | ND           |
|     | 464.3126619 | [M-H] <sup>-</sup> | PE(P-18:0/0:0)  | 0.97 ± 0.17  | 0.84 ± 0.03  | 1.14 ± 0.18  | ND           | ND           | ND           |
| PI  | 961.6214358 | [M-H] <sup>-</sup> | PI(22:2/22:6)   | 0.05 ± 0.00  | 0.13 ± 0.00  | 0.22 ± 0.04  | ND           | ND           | ND           |
|     | 807.505932  | [M-H] <sup>-</sup> | PI(18:1/14:0)   | 0.48 ± 0.04  | 0.80 ± 0.05  | 0.23 ± 0.20  | 1.87 ± 0.05  | 1.48 ± 0.01  | 1.28 ± 0.04  |
|     | 859.5381315 | [M-H] <sup>-</sup> | PI(18:2/18:1)   | 2.72 ± 0.14  | 3.51 ± 0.00  | 4.12 ± 0.12  | 8.48 ± 0.03  | 4.75 ± 0.14  | 5.57 ± 0.10  |
|     | 883.5370049 | [M-H] <sup>-</sup> | PI(18:1/20:4)   | 1.92 ± 0.07  | 2.41 ± 0.02  | 2.38 ± 0.19  | 6.25 ± 0.93  | 3.90 ± 0.10  | 4.31 ± 0.10  |
|     | 833.5222357 | [M-H] <sup>-</sup> | PI(18:2/16:0)   | 0.96 ± 0.06  | 1.19 ± 0.07  | 1.10 ± 0.07  | 3.03 ± 0.05  | 1.75 ± 0.07  | 2.13 ± 0.00  |
|     | 835.5365838 | [M-H] <sup>-</sup> | PI(18:1/16:0)   | 10.56 ± 0.26 | 11.20 ± 0.08 | 10.26 ± 0.13 | 14.53 ± 0.78 | 10.34 ± 0.01 | 10.18 ± 0.16 |
|     | 861.5517509 | [M-H] <sup>-</sup> | PI(18:2/18:0)   | 60.85 ± 1.02 | 59.37 ± 0.12 | 58.55 ± 0.77 | 47.75 ± 0.02 | 54.64 ± 0.18 | 53.20 ± 0.40 |
|     | 885.5537968 | [M-H] <sup>-</sup> | PI(20:4/18:0)   | 22.46 ± 0.45 | 21.39 ± 0.22 | 23.13 ± 0.43 | 18.08 ± 1.67 | 23.14 ± 0.01 | 23.33 ± 0.00 |
| PE  | 712.5001938 | [M-H] <sup>-</sup> | PE(18:3/16:0)   | 0.15 ± 0.03  | 0.21 ± 0.00  | 0.02 ± 0.02  | 1.38 ± 0.07  | 1.42 ± 0.04  | 1.46 ± 0.05  |
|     | 762.5126842 | [M-H] <sup>-</sup> | PE(P-16:0/22:6) | 0.41 ± 0.01  | 0.55 ± 0.01  | ND           | 0.50 ± 0.01  | 0.48 ± 0.03  | 0.57 ± 0.02  |
|     | 736.4988673 | [M-H] <sup>-</sup> | PE(20:5/16:0)   | 0.06 ± 0.08  | 0.13 ± 0.04  | ND           | 0.51 ± 0.03  | 0.55 ± 0.03  | 0.56 ± 0.01  |
|     | 686.4929663 | [M-H] <sup>-</sup> | PE(14:0/18:2)   | 0.13 ± 0.03  | 0.05 ± 0.01  | ND           | 1.10 ± 0.06  | 1.22 ± 0.01  | 1.11 ± 0.03  |
|     | 738.5097834 | [M-H] <sup>-</sup> | PE(P-16:0/20:4) | 1.25 ± 0.05  | 2.16 ± 0.01  | 2.95 ± 0.15  | 4.84 ± 0.13  | 4.27 ± 0.09  | 4.85 ± 0.05  |
|     | 764.5282514 | [M-H] <sup>-</sup> | PE(P-18:1/20:4) | 1.98 ± 0.13  | 2.47 ± 0.03  | 0.73 ± 0.02  | 2.60 ± 0.05  | 2.63 ± 0.08  | 2.77 ± 0.02  |
|     | 790.5408862 | [M-H] <sup>-</sup> | PE(P-18:0/22:6) | 3.36 ± 0.26  | 3.92 ± 0.20  | 0.08 ± 0.11  | 0.93 ± 0.02  | 0.75 ± 0.03  | 0.88 ± 0.02  |

|    |             |                                          |                 |               |              |               |               |               |               |
|----|-------------|------------------------------------------|-----------------|---------------|--------------|---------------|---------------|---------------|---------------|
|    | 740.5220862 | [M-H] <sup>-</sup>                       | PE(18:0/18:3)   | 5.50 ± 0.34   | 8.22 ± 0.27  | 9.01 ± 0.03   | 14.30 ± 0.14  | 12.26 ± 0.30  | 14.10 ± 0.19  |
|    | 724.5280921 | [M-H] <sup>-</sup>                       | PE(P-18:0/18:3) | 1.70 ± 0.08   | 1.30 ± 0.02  | 0.01 ± 0.02   | 0.46 ± 0.01   | 0.63 ± 0.02   | 0.49 ± 0.05   |
|    | 714.5092062 | [M-H] <sup>-</sup>                       | PE(18:2/16:0)   | 3.08 ± 0.32   | 2.66 ± 0.09  | 3.28 ± 0.01   | 8.59 ± 0.25   | 8.46 ± 0.06   | 8.46 ± 0.06   |
|    | 656.4368862 | [M-H] <sup>-</sup>                       | PE(12:0/18:3)   | ND            | 0.01 ± 0.00  | 0.04 ± 0.01   | ND            | ND            | ND            |
|    | 698.5139371 | [M-H] <sup>-</sup>                       | PE(P-16:0/18:2) | 1.79 ± 0.21   | 1.22 ± 0.06  | 0.05 ± 0.01   | 0.85 ± 0.02   | 1.15 ± 0.04   | 0.87 ± 0.09   |
|    | 750.5442059 | [M-H] <sup>-</sup>                       | PE(P-16:0/22:4) | 2.95 ± 0.03   | 2.18 ± 0.05  | 0.01 ± 0.02   | 0.16 ± 0.00   | 0.20 ± 0.01   | 0.17 ± 0.02   |
|    | 766.5419145 | [M-H] <sup>-</sup>                       | PE(P-18:0/20:4) | 8.51 ± 0.26   | 9.08 ± 0.14  | 10.11 ± 0.11  | 5.15 ± 0.16   | 5.14 ± 0.04   | 5.25 ± 0.18   |
|    | 726.5421223 | [M-H] <sup>-</sup>                       | PE(P-16:0/20:2) | 3.19 ± 0.04   | 2.11 ± 0.12  | 0.02 ± 0.03   | 0.69 ± 0.00   | 0.82 ± 0.12   | 0.72 ± 0.09   |
|    | 688.4939063 | [M-H] <sup>-</sup>                       | PE(18:1/14:0)   | 0.68 ± 0.04   | 0.23 ± 0.03  | ND            | 1.61 ± 0.13   | 1.98 ± 0.05   | 1.77 ± 0.11   |
|    | 700.5245426 | [M-H] <sup>-</sup>                       | PE(O-16:0/18:2) | 1.13 ± 0.13   | 0.85 ± 0.05  | 0.24 ± 0.00   | 1.55 ± 0.19   | 2.03 ± 0.25   | 1.55 ± 0.07   |
|    | 728.5447153 | [M-H] <sup>-</sup>                       | PE(P-18:0/18:1) | 1.75 ± 0.04   | 1.36 ± 0.04  | 0.13 ± 0.00   | 1.17 ± 0.06   | 1.16 ± 0.10   | 1.10 ± 0.15   |
|    | 742.5298468 | [M-H] <sup>-</sup>                       | PE(18:2/18:0)   | 53.13 ± 1.00  | 53.93 ± 0.57 | 65.83 ± 0.84  | 39.81 ± 1.24  | 40.24 ± 0.01  | 40.06 ± 0.68  |
|    | 716.5219362 | [M-H] <sup>-</sup>                       | PE(14:1/20:0)   | 4.25 ± 0.06   | 4.17 ± 0.03  | 3.95 ± 0.02   | 12.57 ± 1.06  | 13.34 ± 0.31  | 12.17 ± 0.25  |
|    | 730.5482562 | [M-H] <sup>-</sup>                       | PE(17:1/18:0)   | 0.55 ± 0.11   | 0.54 ± 0.03  | 0.41 ± 0.58   | 0.96 ± 0.11   | 1.10 ± 0.02   | 1.10 ± 0.02   |
|    | 742.5257003 | [M-H] <sup>-</sup>                       | PE(17:2/19:0)   | 4.44 ± 0.28   | 2.60 ± 0.25  | 3.02 ± 0.34   | 0.26 ± 0.02   | 0.17 ± 0.01   | 0.00 ± 0.01   |
|    | 740.5253079 | [M-H] <sup>-</sup>                       | PE(16:0/20:3)   | ND            | 0.06 ± 0.02  | 0.10 ± 0.01   | ND            | ND            | ND            |
| PG | 797.549121  | [M-H] <sup>-</sup>                       | PG(18:2/20:2)   | 66.39 ± 17.28 | 81.22 ± 3.63 | 77.11 ± 10.45 | 100.00 ± 0.00 | 100.00 ± 0.00 | 100.00 ± 0.00 |
|    | 815.4865084 | [M-H] <sup>-</sup>                       | PG(18:3/22:6)   | 11.17 ± 1.92  | 1.82 ± 2.57  | 11.93 ± 10.77 | ND            | ND            | ND            |
|    | 783.515169  | [M-H] <sup>-</sup>                       | PG(17:1/20:3)   | 22.44 ± 19.20 | 16.96 ± 6.21 | 10.96 ± 0.32  | ND            | ND            | ND            |
| SM | 703.5618296 | [M+H] <sup>+</sup> , [M+Na] <sup>+</sup> | SM(d18:1/16:0)  | 10.29 ± 0.50  | 10.35 ± 0.90 | 10.64 ± 0.07  | 21.78 ± 0.98  | 21.09 ± 1.58  | 20.97 ± 0.22  |
|    | 731.5955221 | [M+H] <sup>+</sup> , [M+Na] <sup>+</sup> | SM(d18:1/18:0)  | 11.26 ± 0.04  | 13.87 ± 0.21 | 11.61 ± 0.43  | 1.90 ± 0.02   | 2.07 ± 0.21   | 2.02 ± 0.06   |
|    | 759.6254684 | [M+H] <sup>+</sup> , [M+Na] <sup>+</sup> | SM(d18:1/20:0)  | 12.83 ± 0.32  | 13.88 ± 0.21 | 12.71 ± 0.12  | 9.82 ± 0.33   | 11.17 ± 0.42  | 10.66 ± 0.33  |
|    | 807.6349014 | [M+H] <sup>+</sup>                       | SM(d18:2/22:0)  | 0.31 ± 0.01   | 0.24 ± 0.00  | 0.21 ± 0.01   | 0.10 ± 0.00   | 0.20 ± 0.01   | 0.19 ± 0.01   |
|    | 773.6490555 | [M+H] <sup>+</sup> , [M+Na] <sup>+</sup> | SM(d18:1/21:0)  | 0.87 ± 0.01   | 0.97 ± 0.00  | 0.86 ± 0.01   | 11.99 ± 0.05  | 13.37 ± 0.12  | 12.91 ± 0.30  |
|    | 813.6756568 | [M+H] <sup>+</sup> , [M+Na] <sup>+</sup> | SM(d18:2/24:0)  | 11.65 ± 0.31  | 12.97 ± 0.04 | 10.93 ± 0.14  | 1.74 ± 0.07   | 1.81 ± 0.06   | 1.70 ± 0.03   |
|    | 787.6454481 | [M+H] <sup>+</sup> , [M+Na] <sup>+</sup> | SM(d18:1/22:0)  | 27.76 ± 0.07  | 25.25 ± 0.33 | 28.21 ± 0.01  | 25.85 ± 2.39  | 23.40 ± 0.41  | 23.63 ± 0.37  |
|    | 829.7114312 | [M+H] <sup>+</sup>                       | SM(d18:1/25:0)  | 0.55 ± 0.02   | 0.52 ± 0.00  | 0.53 ± 0.01   | 1.05 ± 0.02   | 1.04 ± 0.04   | 1.02 ± 0.00   |

|    |             |                                          |                |              |              |              |              |              |              |
|----|-------------|------------------------------------------|----------------|--------------|--------------|--------------|--------------|--------------|--------------|
|    | 801.6766854 | [M+H] <sup>+</sup> , [M+Na] <sup>+</sup> | SM(d18:1/23:0) | 3.61 ± 0.03  | 3.62 ± 0.07  | 3.58 ± 0.14  | 14.97 ± 0.56 | 15.30 ± 0.97 | 15.92 ± 0.05 |
|    | 815.6778679 | [M+H] <sup>+</sup> , [M+Na] <sup>+</sup> | SM(d18:1/24:0) | 20.87 ± 0.36 | 18.32 ± 0.05 | 20.71 ± 0.31 | 10.80 ± 0.51 | 10.56 ± 0.61 | 10.98 ± 0.14 |
| PC | 678.5038049 | [M+H] <sup>+</sup>                       | PC(10:0/18:0)  | 0.09 ± 0.01  | 0.14 ± 0.03  | 0.07 ± 0.01  | 3.05 ± 0.15  | 3.43 ± 0.53  | 3.72 ± 0.26  |
|    | 706.5217218 | [M+H] <sup>+</sup> , [M+Na] <sup>+</sup> | PC(14:0/16:0)  | 1.87 ± 0.09  | 2.24 ± 0.07  | 1.73 ± 0.07  | 17.57 ± 0.07 | 19.19 ± 0.55 | 18.42 ± 0.13 |
|    | 758.5475821 | [M+H] <sup>+</sup> , [M+Na] <sup>+</sup> | PC(16:0/18:2)  | 60.41 ± 0.37 | 60.69 ± 2.59 | 62.14 ± 0.25 | 43.32 ± 0.15 | 40.07 ± 0.17 | 41.56 ± 0.02 |
|    | 720.5568391 | [M+H] <sup>+</sup>                       | PC(16:0/15:0)  | 0.84 ± 0.04  | 0.80 ± 0.06  | 0.89 ± 0.02  | 3.74 ± 0.18  | 4.39 ± 0.16  | 4.21 ± 0.04  |
|    | 734.5505858 | [M+H] <sup>+</sup> , [M+Na] <sup>+</sup> | PC(16:0/16:0)  | 16.74 ± 0.12 | 18.82 ± 0.73 | 17.37 ± 0.57 | 19.65 ± 0.01 | 21.56 ± 0.65 | 20.17 ± 0.20 |
|    | 748.5880855 | [M+H] <sup>+</sup>                       | PC(17:0/16:0)  | 0.75 ± 0.02  | 0.76 ± 0.03  | 0.73 ± 0.00  | 1.92 ± 0.10  | 2.38 ± 0.15  | 2.20 ± 0.05  |
|    | 806.5662466 | [M+H] <sup>+</sup>                       | PC(18:3/18:0)  | 1.05 ± 0.07  | 0.94 ± 0.16  | 0.95 ± 0.02  | 0.95 ± 0.23  | 0.48 ± 0.03  | 0.62 ± 0.01  |
|    | 774.6021147 | [M+H] <sup>+</sup>                       | PC(16:0/19:1)  | 0.35 ± 0.02  | 0.16 ± 0.08  | 0.07 ± 0.00  | 0.46 ± 0.06  | 0.78 ± 0.04  | 0.68 ± 0.21  |
|    | 782.5615541 | [M+H] <sup>+</sup>                       | PC(16:0/18:1)  | 6.05 ± 0.27  | 5.67 ± 0.67  | 6.19 ± 0.43  | 5.64 ± 0.04  | 4.94 ± 0.02  | 5.31 ± 0.04  |
|    | 808.5773401 | [M+H] <sup>+</sup>                       | PC(18:1/18:1)  | 11.85 ± 0.02 | 9.79 ± 0.96  | 9.88 ± 0.29  | 3.69 ± 0.07  | 2.78 ± 0.00  | 3.10 ± 0.09  |

The values are represented as the means ± SD.
